# Supplementary material for: Association of State Laws Regarding Snacks in US Schools With Students' Consumption of Solid Fats and Added Sugars
Source: PubMed Central journal article supplement (PMC6991240; doi:10.1001/jamanetworkopen.2019.18436), 2020-01-15
Supplement: jamanetwopen-3-e1918436-s001.pdf [file jamanetwopen-3-e1918436-s001.pdf]

## Supplementary Online Content

Turner L, Leider J, Piekarz-Porter E, Chriqui JF. Association of state laws regarding snacks in US schools with students' consumption of solid fats and added sugars. *JAMA Network Open*. 2020;3(1):e1918436. doi:10.1001/jamanetworkopen.2019.18436

**eTable 1.** Multivariable Linear Regression Model Examining the Association of State-Level Smart Snacks Policy With Students' Daily Energy Intake From Solid Fats in Kilocalories

**eTable 2.** Multivariable Linear Regression Model Examining the Association of State-Level Smart Snacks Policy With Students' Daily Energy Intake From Added Sugars in Kilocalories

**eTable 3.** Multivariable Linear Regression Model Examining the Association of State-Level Smart Snacks Policy With Students' Daily Intake of Sodium in Milligrams

**eTable 4.** Multivariable Logistic Regression Model Examining the Association of State-Level Smart Snacks Policy With Student Consumption of Snacks Obtained at School Among 1959 Students

This supplementary material has been provided by the authors to give readers additional information about their work.

**eTable 1.** Multivariable Linear Regression Model Examining the Association of State-Level Smart Snacks Policy With Students' Daily Energy Intake From Solid Fats in Kilocalories

| Variable                                                                      | All Students (n = 1959) |         |               |              | Students who Consumed Snacks Purchased at School (n = 528) |         |               |              |
|-------------------------------------------------------------------------------|-------------------------|---------|---------------|--------------|------------------------------------------------------------|---------|---------------|--------------|
|                                                                               | Coefficient (95% CI)    | P Value | Adjusted Mean | 95% CI       | Coefficient (95% CI)                                       | P Value | Adjusted Mean | 95% CI       |
| State Law Requires Smart Snacks Standards to Be Followed in All School Venues |                         |         |               |              |                                                            |         |               |              |
| No                                                                            | 0 [Reference]           | --      | 295.3         | 280.5, 310.2 | 0 [Reference]                                              | --      | 300.6         | 272.1, 329.1 |
| Yes                                                                           | -37.70 (-62.78, -12.62) | .004    | 257.6         | 237.1, 278.1 | -53.50 (-97.03, -9.97)                                     | .02     | 247.1         | 208.2, 286.0 |
| Student Grade (continuous)                                                    | 2.89 (-1.44, 7.21)      | .19     | --            |              | 2.53 (-4.77, 9.83)                                         | .49     | --            |              |
| Student Gender                                                                |                         |         |               |              |                                                            |         |               |              |
| Male                                                                          | 0 [Reference]           | --      | 312.7         | 295.7, 329.8 | 0 [Reference]                                              | --      | 346.3         | 306.1, 386.6 |
| Female                                                                        | -52.69 (-71.87, -33.50) | <.001   | 260.1         | 245.4, 274.7 | -105.18 (-147.42, -62.95)                                  | <.001   | 241.1         | 217.5, 264.7 |
| Student Race/Ethnicity                                                        |                         |         |               |              |                                                            |         |               |              |
| White, non-Hispanic                                                           | 0 [Reference]           | --      | 290.5         | 274.2, 306.7 | 0 [Reference]                                              | --      | 299.0         | 258.9, 339.0 |
| Black, non-Hispanic                                                           | -0.88 (-39.88, 38.13)   | .96     | 289.6         | 252.0, 327.1 | 1.20 (-79.18, 81.58)                                       | .98     | 300.2         | 236.7, 363.6 |
| Hispanic                                                                      | -12.68 (-43.87, 18.51)  | .42     | 277.8         | 251.2, 304.4 | -22.30 (-103.22, 58.61)                                    | .59     | 276.7         | 209.9, 343.4 |
| Other                                                                         | -3.03 (-44.80, 38.74)   | .89     | 287.4         | 246.6, 328.3 | -55.31 (-136.96, 26.33)                                    | .18     | 243.7         | 182.5, 304.8 |
| School Urbanicity                                                             |                         |         |               |              |                                                            |         |               |              |
| Urban                                                                         | 0 [Reference]           | --      | 303.5         | 272.4, 334.6 | 0 [Reference]                                              | --      | 315.1         | 275.5, 354.6 |
| Suburban                                                                      | -27.30 (-65.23, 10.63)  | .16     | 276.2         | 258.6, 293.8 | -25.75 (-66.30, 14.81)                                     | .21     | 289.3         | 258.4, 320.3 |
| Rural                                                                         | -11.71 (-47.52, 24.10)  | .52     | 291.8         | 269.2, 314.4 | -49.27 (-99.02, 0.47)                                      | .052    | 265.8         | 223.1, 308.4 |
| School Size                                                                   |                         |         |               |              |                                                            |         |               |              |
| Large (≥1000 students)                                                        | 0 [Reference]           | --      | 286.3         | 264.5, 308.1 | 0 [Reference]                                              | --      | 303.3         | 252.4, 354.1 |
| Medium (500 to 999 students)                                                  | -3.21 (-34.03, 27.61)   | .84     | 283.1         | 263.8, 302.4 | -36.51 (-95.59, 22.57)                                     | .22     | 266.8         | 233.0, 300.5 |
| Small (< 500 students)                                                        | 8.26 (-20.81, 37.33)    | .57     | 294.6         | 270.5, 318.7 | 5.07 (-55.97, 66.12)                                       | .87     | 308.3         | 271.3, 345.3 |
| Race/Ethnicity (District)                                                     |                         |         |               |              |                                                            |         |               |              |
| ≥66% White                                                                    | 0 [Reference]           | --      | 291.8         | 272.4, 311.3 | 0 [Reference]                                              | --      | 281.8         | 237.3, 326.4 |
| ≥50% Black                                                                    | 4.12 (-46.44, 54.68)    | .87     | 296.0         | 247.7, 344.3 | -3.94 (-93.84, 85.96)                                      | .93     | 277.9         | 198.5, 357.3 |
| ≥50% Hispanic                                                                 | -5.37 (-55.79, 45.06)   | .83     | 286.5         | 243.6, 329.4 | 25.27 (-38.73, 89.27)                                      | .44     | 307.1         | 260.9, 353.4 |
| Other                                                                         | -10.47 (-36.30, 15.35)  | .42     | 281.4         | 264.6, 298.1 | 7.38 (-46.65, 61.41)                                       | .79     | 289.2         | 257.3, 321.2 |
| Child Poverty Rate (District)                                                 |                         |         |               |              |                                                            |         |               |              |
| <20%                                                                          | 0 [Reference]           | --      | 289.0         | 269.5, 308.6 | 0 [Reference]                                              | --      | 292.0         | 256.6, 327.4 |
| ≥20%                                                                          | -6.63 (-36.77, 23.51)   | .66     | 282.4         | 264.1, 300.7 | -8.99 (-58.32, 40.34)                                      | .72     | 283.0         | 248.2, 317.9 |
| Region                                                                        |                         |         |               |              |                                                            |         |               |              |
| West                                                                          | 0 [Reference]           | --      | 298.4         | 274.1, 322.7 | 0 [Reference]                                              | --      | 288.4         | 248.0, 328.7 |
| Midwest                                                                       | 10.20 (-21.83, 42.23)   | .53     | 308.6         | 291.8, 325.4 | 41.15 (-13.56, 95.86)                                      | .14     | 329.5         | 293.0, 366.0 |

---

|           |                          |      |       |              |                        |      |       |              |
|-----------|--------------------------|------|-------|--------------|------------------------|------|-------|--------------|
| South     | -11.23 (-52.63, 30.16)   | .59  | 287.2 | 263.7, 310.6 | -1.92 (-59.55, 55.72)  | .95  | 286.4 | 246.8, 326.1 |
| Northeast | -67.30 (-110.47, -24.13) | .003 | 231.1 | 193.2, 269.0 | -75.12 (-150.74, 0.50) | .052 | 213.2 | 148.3, 278.2 |

---

**eTable 2.** Multivariable Linear Regression Model Examining the Association of State-Level Smart Snacks Policy With Students' Daily Energy Intake From Added Sugars in Kilocalories

| Variable                                                                      | All Students<br>(n = 1959) |         |               |              | Students who Consumed Snacks Obtained at School<br>(n = 528) |         |               |              |
|-------------------------------------------------------------------------------|----------------------------|---------|---------------|--------------|--------------------------------------------------------------|---------|---------------|--------------|
|                                                                               | Coefficient (95% CI)       | P Value | Adjusted Mean | 95% CI       | Coefficient (95% CI)                                         | P Value | Adjusted Mean | 95% CI       |
| State Law Requires Smart Snacks Standards to Be Followed in All School Venues |                            |         |               |              |                                                              |         |               |              |
| No                                                                            | 0 [Reference]              | --      | 267.2         | 248.4, 286.0 | 0 [Reference]                                                | --      | 281.4         | 259.8, 303.0 |
| Yes                                                                           | -16.17 (-51.28, 18.95)     | .36     | 251.1         | 219.4, 282.7 | -10.04 (-56.92, 36.85)                                       | .67     | 271.4         | 224.1, 318.7 |
| Student Grade (continuous)                                                    | 1.87 (-2.63, 6.37)         | .41     | --            | --           | 1.25 (-6.73, 9.24)                                           | .76     | --            | --           |
| Student Gender                                                                |                            |         |               |              |                                                              |         |               |              |
| Male                                                                          | 0 [Reference]              | --      | 280.9         | 258.3, 303.5 | 0 [Reference]                                                | --      | 304.2         | 273.6, 334.8 |
| Female                                                                        | -35.22 (-56.92, -13.52)    | .002    | 245.7         | 228.7, 262.6 | -45.93 (-80.19, -11.67)                                      | .009    | 258.3         | 234.3, 282.3 |
| Student Race/Ethnicity                                                        |                            |         |               |              |                                                              |         |               |              |
| White, non-Hispanic                                                           | 0 [Reference]              | --      | 262.5         | 242.7, 282.4 | 0 [Reference]                                                | --      | 275.0         | 246.3, 303.7 |
| Black, non-Hispanic                                                           | 38.16 (-1.24, 77.55)       | .06     | 300.7         | 261.4, 339.9 | 49.02 (0.05, 97.99)                                          | .050    | 324.0         | 275.5, 372.5 |
| Hispanic                                                                      | -8.31 (-38.56, 21.93)      | .59     | 254.2         | 227.2, 281.2 | -7.13 (-67.43, 53.16)                                        | .82     | 267.9         | 220.7, 315.0 |
| Other                                                                         | -21.35 (-60.73, 18.03)     | .29     | 241.2         | 201.4, 280.9 | -31.00 (-106.20, 44.20)                                      | .42     | 244.0         | 177.2, 310.8 |
| School Urbanicity                                                             |                            |         |               |              |                                                              |         |               |              |
| Urban                                                                         | 0 [Reference]              | --      | 296.8         | 267.3, 326.2 | 0 [Reference]                                                | --      | 332.3         | 297.0, 367.6 |
| Suburban                                                                      | -50.57 (-81.13, -20.02)    | .001    | 246.2         | 227.4, 264.9 | -77.17 (-116.39, -37.96)                                     | <.001   | 255.1         | 230.6, 279.6 |
| Rural                                                                         | -30.28 (-71.16, 10.59)     | .15     | 266.5         | 233.9, 299.1 | -56.79 (-107.13, -6.45)                                      | .03     | 275.5         | 233.2, 317.8 |
| School Size                                                                   |                            |         |               |              |                                                              |         |               |              |
| Large (≥1000 students)                                                        | 0 [Reference]              | --      | 268.2         | 238.8, 297.6 | 0 [Reference]                                                | --      | 300.2         | 259.7, 340.8 |
| Medium (500 to 999 students)                                                  | -10.39 (-42.32, 21.54)     | .52     | 257.8         | 235.0, 280.6 | -46.11 (-90.86, -1.36)                                       | .04     | 254.1         | 227.0, 281.3 |
| Small (< 500 students)                                                        | 0.30 (-39.92, 40.53)       | .99     | 268.5         | 244.4, 292.6 | -7.86 (-84.18, 68.45)                                        | .84     | 292.4         | 244.1, 340.6 |
| Race/Ethnicity (District)                                                     |                            |         |               |              |                                                              |         |               |              |
| ≥66% White                                                                    | 0 [Reference]              | --      | 310.5         | 280.8, 340.2 | 0 [Reference]                                                | --      | 330.1         | 297.1, 363.0 |
| ≥50% Black                                                                    | -66.29 (-116.43, -16.15)   | .01     | 244.2         | 201.8, 286.6 | -91.41 (-161.69, -21.12)                                     | .01     | 238.7         | 172.8, 304.6 |
| ≥50% Hispanic                                                                 | -84.82 (-130.14, -39.51)   | <.001   | 225.7         | 195.6, 255.8 | -95.20 (-156.03, -34.37)                                     | .002    | 234.9         | 185.6, 284.2 |
| Other                                                                         | -71.54 (-109.09, -33.98)   | <.001   | 239.0         | 217.0, 261.0 | -75.26 (-117.77, -32.76)                                     | .001    | 254.8         | 223.7, 285.9 |
| Child Poverty Rate (District)                                                 |                            |         |               |              |                                                              |         |               |              |
| <20%                                                                          | 0 [Reference]              | --      | 262.5         | 240.3, 284.7 | 0 [Reference]                                                | --      | 270.9         | 242.4, 299.4 |
| ≥20%                                                                          | 3.40 (-23.97, 30.77)       | .81     | 265.9         | 246.5, 285.3 | 25.45 (-15.46, 66.36)                                        | .22     | 296.4         | 266.6, 326.2 |
| Region                                                                        |                            |         |               |              |                                                              |         |               |              |
| West                                                                          | 0 [Reference]              | --      | 260.6         | 235.4, 285.7 | 0 [Reference]                                                | --      | 291.8         | 259.9, 323.6 |
| Midwest                                                                       | 9.21 (-25.59, 44.00)       | .60     | 269.8         | 245.9, 293.6 | 5.28 (-40.81, 51.36)                                         | .82     | 297.1         | 262.2, 331.9 |
| South                                                                         | 16.91 (-17.99, 51.82)      | .34     | 277.5         | 251.8, 303.2 | -1.47 (-47.08, 44.15)                                        | .95     | 290.3         | 260.2, 320.4 |
| Northeast                                                                     | -50.13 (-102.23, 1.98)     | .06     | 210.4         | 161.3, 259.6 | -112.70 (-168.44, -56.96)                                    | <.001   | 179.1         | 128.7, 229.4 |

**eTable 3.** Multivariable Linear Regression Model Examining the Association of State-Level Smart Snacks Policy With Students' Daily Intake of Sodium in Milligrams

| Variable                                                                      | All Students<br>(n = 1959) |         |               |                | Students who Consumed Snacks Obtained at School<br>(n = 528) |         |               |                |
|-------------------------------------------------------------------------------|----------------------------|---------|---------------|----------------|--------------------------------------------------------------|---------|---------------|----------------|
|                                                                               | Coefficient (95% CI)       | P Value | Adjusted Mean | 95% CI         | Coefficient (95% CI)                                         | P Value | Adjusted Mean | 95% CI         |
| State Law Requires Smart Snacks Standards to Be Followed in All School Venues |                            |         |               |                |                                                              |         |               |                |
| No                                                                            | 0 [Reference]              | --      | 3162.7        | 3056.0, 3269.5 | 0 [Reference]                                                | --      | 3223.3        | 3006.6, 3440.1 |
| Yes                                                                           | 13.55 (-238.71, 265.81)    | .92     | 3176.3        | 2927.8, 3424.8 | -280.60 (-634.20, 72.99)                                     | .12     | 2942.7        | 2648.4, 3237.0 |
| Student Grade (continuous)                                                    | 45.36 (19.14, 71.58)       | .001    | --            |                | 46.24 (-10.86, 103.33)                                       | .11     | --            |                |
| Student Gender                                                                |                            |         |               |                |                                                              |         |               |                |
| Male                                                                          | 0 [Reference]              | --      | 3453.5        | 3297.1, 3609.9 | 0 [Reference]                                                | --      | 3636.9        | 3337.3, 3936.6 |
| Female                                                                        | -585.56 (-764.04, -407.09) | <.001   | 2867.9        | 2754.8, 2981.0 | -871.15 (-1206.22, -536.08)                                  | <.001   | 2765.8        | 2591.9, 2939.7 |
| Student Race/Ethnicity                                                        |                            |         |               |                |                                                              |         |               |                |
| White, non-Hispanic                                                           | 0 [Reference]              | --      | 3106.9        | 2948.1, 3265.6 | 0 [Reference]                                                | --      | 3154.7        | 2883.3, 3426.0 |
| Black, non-Hispanic                                                           | 102.52 (-186.59, 391.63)   | .48     | 3209.4        | 2968.9, 3449.9 | 3.83 (-435.40, 443.05)                                       | .99     | 3158.5        | 2843.4, 3473.5 |
| Hispanic                                                                      | 121.85 (-113.02, 356.71)   | .31     | 3228.7        | 3058.2, 3399.3 | -87.23 (-575.70, 401.23)                                     | .72     | 3067.4        | 2684.9, 3449.9 |
| Other                                                                         | 164.08 (-181.47, 509.62)   | .35     | 3271.0        | 2938.6, 3603.3 | 350.48 (-629.38, 1330.34)                                    | .48     | 3505.1        | 2543.5, 4466.8 |
| School Urbanicity                                                             |                            |         |               |                |                                                              |         |               |                |
| Urban                                                                         | 0 [Reference]              | --      | 3213.8        | 2914.2, 3513.3 | 0 [Reference]                                                | --      | 3105.1        | 2836.5, 3373.6 |
| Suburban                                                                      | -102.26 (-453.36, 248.84)  | .57     | 3111.5        | 2980.1, 3242.9 | 79.71 (-330.56, 489.99)                                      | .70     | 3184.8        | 2890.1, 3479.4 |
| Rural                                                                         | 9.06 (-343.47, 361.59)     | .96     | 3222.8        | 3010.2, 3435.5 | 70.14 (-396.44, 536.73)                                      | .77     | 3175.2        | 2705.3, 3645.1 |
| School Size                                                                   |                            |         |               |                |                                                              |         |               |                |
| Large (≥1000 students)                                                        | 0 [Reference]              | --      | 3368.0        | 3168.6, 3567.3 | 0 [Reference]                                                | --      | 3393.9        | 2954.5, 3833.2 |
| Medium (500 to 999 students)                                                  | -303.83 (-553.41, -54.26)  | .02     | 3064.2        | 2925.2, 3203.2 | -425.93 (-911.23, 59.38)                                     | .09     | 2967.9        | 2748.2, 3187.7 |
| Small (< 500 students)                                                        | -272.92 (-521.95, -23.90)  | .03     | 3095.1        | 2917.6, 3272.5 | -242.22 (-864.42, 379.99)                                    | .44     | 3151.6        | 2835.6, 3467.7 |
| Race/Ethnicity (District)                                                     |                            |         |               |                |                                                              |         |               |                |

|                                      |                            |      |        |                   |                             |     |        |                   |  |
|--------------------------------------|----------------------------|------|--------|-------------------|-----------------------------|-----|--------|-------------------|--|
| ≥66% White                           | 0 [Reference]              | --   | 3232.4 | 3067.2,<br>3397.6 | 0 [Reference]               | --  | 3278.1 | 2968.3,<br>3587.8 |  |
| ≥50% Black                           | 246.10 (-59.99, 552.19)    | .11  | 3478.5 | 3211.0,<br>3746.0 | 292.15 (-653.02, 1237.33)   | .54 | 3570.2 | 2624.7,<br>4515.7 |  |
| ≥50% Hispanic                        | -89.25 (-395.08, 216.58)   | .56  | 3143.2 | 2923.3,<br>3363.0 | -249.37 (-775.86, 277.13)   | .35 | 3028.7 | 2701.1,<br>3356.2 |  |
| Other                                | -153.82 (-393.28, 85.65)   | .21  | 3078.6 | 2908.0,<br>3249.1 | -225.96 (-645.90, 193.99)   | .29 | 3052.1 | 2770.1,<br>3334.1 |  |
| <b>Child Poverty Rate (District)</b> |                            |      |        |                   |                             |     |        |                   |  |
| <20%                                 | 0 [Reference]              | --   | 3193.8 | 3051.6,<br>3336.0 | 0 [Reference]               | --  | 3103.2 | 2909.9,<br>3296.6 |  |
| ≥20%                                 | -85.41 (-271.30, 100.47)   | .36  | 3108.4 | 2978.1,<br>3238.7 | 182.96 (-89.88, 455.80)     | .19 | 3286.2 | 3010.1,<br>3562.2 |  |
| <b>Region</b>                        |                            |      |        |                   |                             |     |        |                   |  |
| West                                 | 0 [Reference]              | --   | 3273.5 | 3036.8,<br>3510.3 | 0 [Reference]               | --  | 3396.9 | 2820.7,<br>3973.1 |  |
| Midwest                              | 46.15 (-269.95, 362.24)    | .77  | 3319.7 | 3103.9,<br>3535.4 | -227.81 (-815.22, 359.60)   | .44 | 3169.1 | 2929.0,<br>3409.1 |  |
| South                                | -127.52 (-408.46, 153.42)  | .37  | 3146.0 | 3027.1,<br>3264.9 | -179.26 (-838.28, 479.75)   | .59 | 3217.6 | 2951.5,<br>3483.7 |  |
| Northeast                            | -464.44 (-794.67, -134.22) | .006 | 2809.1 | 2532.9,<br>3085.3 | -787.78 (-1458.21, -117.35) | .02 | 2609.1 | 2066.6,<br>3151.6 |  |

**eTable 4.** Multivariable Logistic Regression Model Examining the Association of State-Level Smart Snacks Policy With Student Consumption of Snacks Obtained at School Among 1959 Students

| Variable                                                                      | Odds Ratio (95% CI) | P Value | Adjusted Prevalence | 95% CI     |
|-------------------------------------------------------------------------------|---------------------|---------|---------------------|------------|
| State Law Requires Smart Snacks Standards to Be Followed in All School Venues |                     |         |                     |            |
| No                                                                            | 1 [Reference]       | --      | 26.9                | 23.8, 30.0 |
| Yes                                                                           | 0.82 (0.59, 1.15)   | .25     | 23.3                | 18.3, 28.4 |
| Student Grade (continuous)                                                    | 1.06 (1.02, 1.11)   | .007    | --                  |            |
| Student Gender                                                                |                     |         |                     |            |
| Male                                                                          | 1 [Reference]       | --      | 23.3                | 19.7, 27.0 |
| Female                                                                        | 1.35 (1.03, 1.75)   | .03     | 28.9                | 25.3, 32.6 |
| Student Race/Ethnicity                                                        |                     |         |                     |            |
| White, non-Hispanic                                                           | 1 [Reference]       | --      | 23.8                | 19.9, 27.8 |
| Black, non-Hispanic                                                           | 1.82 (1.22, 2.71)   | .004    | 36.0                | 28.4, 43.7 |
| Hispanic                                                                      | 1.13 (0.80, 1.61)   | .48     | 26.1                | 21.1, 31.2 |
| Other                                                                         | 1.08 (0.65, 1.77)   | .77     | 25.2                | 17.7, 32.6 |
| School Urbanicity                                                             |                     |         |                     |            |
| Urban                                                                         | 1 [Reference]       | --      | 27.0                | 18.9, 35.0 |
| Suburban                                                                      | 0.93 (0.56, 1.53)   | .77     | 25.6                | 21.7, 29.4 |
| Rural                                                                         | 0.97 (0.60, 1.55)   | .89     | 26.3                | 22.5, 30.1 |
| School Size                                                                   |                     |         |                     |            |
| Large ( $\geq 1000$ students)                                                 | 1 [Reference]       | --      | 27.4                | 22.3, 32.5 |
| Medium (500 to 999 students)                                                  | 0.90 (0.64, 1.28)   | .57     | 25.5                | 21.4, 29.6 |
| Small ( $< 500$ students)                                                     | 0.90 (0.57, 1.42)   | .64     | 25.4                | 18.8, 31.9 |
| Race/Ethnicity (District)                                                     |                     |         |                     |            |
| $\geq 66\%$ White                                                             | 1 [Reference]       | --      | 28.4                | 23.6, 33.1 |
| $\geq 50\%$ Black                                                             | 0.94 (0.57, 1.56)   | .82     | 27.3                | 19.1, 35.4 |
| $\geq 50\%$ Hispanic                                                          | 0.98 (0.51, 1.89)   | .95     | 27.9                | 17.2, 38.7 |
| Other                                                                         | 0.76 (0.53, 1.08)   | .12     | 23.2                | 19.3, 27.0 |
| Child Poverty Rate (District)                                                 |                     |         |                     |            |
| $< 20\%$                                                                      | 1 [Reference]       | --      | 26.6                | 22.3, 30.8 |
| $\geq 20\%$                                                                   | 0.93 (0.63, 1.37)   | .70     | 25.2                | 20.5, 29.8 |
| Region                                                                        |                     |         |                     |            |
| West                                                                          | 1 [Reference]       | --      | 25.5                | 16.6, 34.4 |
| Midwest                                                                       | 1.05 (0.60, 1.86)   | .86     | 26.4                | 21.5, 31.4 |
| South                                                                         | 1.08 (0.61, 1.92)   | .79     | 27.0                | 22.8, 31.1 |
| Northeast                                                                     | 0.89 (0.44, 1.80)   | .74     | 23.3                | 14.8, 31.8 |
